# Supplementary material for: The prevalence of anemia and iron deficiency among pregnant Ghanaian women, a longitudinal study
Source: PLoS One. 2021 Mar 24;16(3):e0248754. doi: 10.1371/journal.pone.0248754 (PMC7990185; doi:10.1371/journal.pone.0248754)
Supplement: S1 Data — (CSV) [file pone.0248754.s001.csv]

ID	district	clinic	gest age (w)	trimester	attended school	level of educ completed	yrs in school	in relationship	married	live with husband	head of HH	head of HH sex	adults in HH	children in HH	sickle cell	# pregnancies	# living children	taking fe supp	# supp/w	other supp	red meat/w	organ meat/w	green veg/w	fruit/w	appetite	appetite change	health ins	income	amount/w	income usual	income comparison	income level	worried about food	ran out of food	money for food	limited diversity	skipped meal	ate less	felt hungry	one or no meals	child under 5	# child under 5	lack healthy food	limited diversity_C	skipped meal_C	ate less_C	feed less	felt hungry_C	one or no meals_C
1002	3	8	5	1	1	3	13	1	1	1	2	1	1	0	2	2	0	2	.	2	1	1	4	4	2	1	1	1	63	1	4	1	0	0	0	0	0	0	0	0	2	0	.	.	.	.	.	.	.
1003	3	8	8	1	1	3	12	1	1	1	2	1	1	1	2	2	1	2	.	2	1	1	4	4	1	1	1	1	40	1	1	1	0	0	0	0	0	0	0	0	2	0	.	.	.	.	.	.	.
1008	1	6	8	1	2	.	.	1	1	1	2	.	1	2	2	4	2	1	3	1	1	1	2	4	2	1	1	1	.	1	3	1	0	0	1	1	0	1	1	0	2	0	.	.	.	.	.	.	.
1009	3	8	11	1	1	3	11	1	1	1	1	.	4	7	2	3	2	2	.	2	3	1	4	4	1	1	1	1	60	1	2	1	0	0	0	0	0	0	0	0	1	7	0	0	0	0	0	0	0
1010	3	8	0	1	1	1	6	1	2	2	2	2	5	5	2	3	2	2	.	2	4	4	3	4	2	2	1	1	.	4	1	1	1	1	1	1	1	1	1	1	1	3	1	1	0	1	1	0	0
1012	3	8	0	1	1	2	9	1	2	2	2	2	3	0	2	1	0	2	.	2	1	1	1	3	1	1	2	2	.	.	4	1	0	0	0	0	0	0	0	0	2	0	.	.	.	.	.	.	.
1013	3	8	8	1	1	3	12	1	2	1	2	1	1	0	2	1	0	2	.	2	1	3	4	4	2	1	1	1	.	1	4	1	0	0	0	0	1	0	0	0	2	0	.	.	.	.	.	.	.
1014	1	6	6	1	1	2	9	1	1	1	2	1	1	0	2	2	0	2	.	2	1	1	1	2	1	3	1	1	80	1	3	1	0	1	1	0	1	1	0	0	2	0	.	.	.	.	.	.	.
1015	1	6	7	1	1	4	16	1	1	1	2	1	1	0	2	3	1	2	.	1	1	1	3	4	2	1	1	2	.	.	2	1	1	1	1	0	0	1	0	0	2	0	.	.	.	.	.	.	.
1016	3	8	4	1	1	2	9	1	2	2	2	2	3	0	2	1	0	1	3	2	1	2	2	4	2	3	1	2	.	.	1	1	0	1	1	1	0	1	1	1	2	0	.	.	.	.	.	.	.
1017	3	8	8	1	1	2	9	1	1	1	2	1	2	0	2	2	1	2	.	2	1	1	3	4	1	2	1	1	.	4	4	1	0	1	1	1	0	0	0	0	1	1	0	0	0	0	0	0	0
1018	3	8	12	1	1	2	9	1	1	1	1	.	0	0	2	1	0	2	.	2	2	1	4	4	1	3	2	2	.	.	4	1	1	1	0	1	0	1	0	0	1	2	1	1	0	1	1	0	0
1019	3	8	11	1	1	2	8	1	1	1	2	1	2	0	2	3	2	2	.	2	2	2	4	4	1	1	1	1	.	1	4	1	0	1	0	0	0	1	0	0	2	0	.	.	.	.	.	.	.
1021	3	8	12	1	1	2	9	1	1	1	2	1	0	3	2	4	3	2	.	2	2	1	2	4	2	1	1	2	.	.	2	1	0	0	0	0	0	0	0	0	1	2	0	0	0	0	0	0	0
1023	3	8	0	1	1	2	9	1	1	1	1	.	0	0	2	3	2	2	.	2	1	1	2	4	2	1	2	1	100	1	2	1	0	0	1	1	1	1	1	1	2	0	.	.	.	.	.	.	.
1024	3	8	11	1	1	2	9	1	1	1	2	1	3	0	2	2	1	2	.	1	1	1	1	4	2	1	1	1	20	3	4	2	1	1	1	0	0	0	0	1	2	0	.	.	.	.	.	.	.
1027	1	6	6	1	1	4	17	1	1	1	2	1	1	0	2	1	0	1	3	2	3	2	4	4	2	1	1	1	250	1	2	2	0	0	0	0	0	0	0	0	2	0	.	.	.	.	.	.	.
1028	3	8	0	1	1	2	8	1	1	1	1	.	1	0	2	3	2	2	.	2	1	1	4	4	2	1	1	1	.	4	4	1	1	0	0	0	0	0	0	0	1	1	0	0	0	0	0	0	0
1034	4	2	11	1	1	3	12	1	1	1	2	1	3	3	2	5	4	2	.	2	3	3	4	4	1	1	1	1	25	1	1	1	1	0	1	0	0	0	0	0	2	0	.	.	.	.	.	.	.
1035	3	8	0	1	1	3	11	1	1	1	2	1	2	0	2	2	1	2	.	2	2	1	3	4	2	2	2	1	.	1	2	1	1	1	1	0	0	0	1	1	2	0	.	.	.	.	.	.	.
1037	3	8	12	1	1	1	3	1	1	1	2	1	1	0	2	4	2	2	.	1	3	3	4	3	1	3	1	2	.	.	1	1	1	1	1	0	0	1	1	1	1	2	0	0	0	1	1	0	1
1038	3	8	4	1	1	2	9	1	2	2	1	.	0	0	2	4	2	2	.	2	4	1	3	2	1	3	1	1	10000	1	4	3	0	0	0	0	0	0	0	0	2	0	.	.	.	.	.	.	.
1039	3	8	8	1	1	1	6	1	1	1	2	1	0	2	2	4	2	2	.	2	1	1	3	4	2	1	1	1	.	.	4	1	0	0	0	0	0	0	0	0	2	0	.	.	.	.	.	.	.
1040	3	8	8	1	1	3	12	1	2	1	1	1	2	0	2	3	1	2	.	2	3	2	4	3	1	3	1	2	.	.	2	1	1	1	1	1	1	1	1	0	1	1	0	0	0	0	0	0	0
1041	3	8	8	1	1	2	8	1	2	1	2	1	0	0	2	3	1	2	.	2	1	1	2	4	1	3	2	1	.	3	2	1	1	1	1	0	0	0	0	0	2	0	.	.	.	.	.	.	.
1044	3	8	12	1	1	3	12	1	2	2	2	4	3	6	2	1	0	2	.	2	1	1	4	4	1	2	2	2	.	.	2	1	0	0	1	1	1	0	0	0	1	2	0	0	0	0	0	0	0
1047	1	6	9	1	1	3	12	1	1	1	2	1	1	0	2	2	0	2	.	1	3	1	2	4	2	3	1	1	.	4	2	1	0	0	0	0	0	0	0	0	2	0	.	.	.	.	.	.	.
1048	3	8	8	1	1	2	8	1	1	1	2	1	1	4	2	7	4	2	.	2	1	1	2	3	2	1	1	1	.	4	2	1	0	0	1	1	1	0	0	0	2	0	.	.	.	.	.	.	.
1053	1	6	4	1	1	2	9	1	1	1	1	.	0	3	2	4	3	2	.	2	2	1	3	4	2	1	1	1	50	1	3	1	0	1	1	1	0	0	0	0	1	2	0	0	0	0	0	0	0
1054	3	8	10	1	1	2	9	1	2	1	2	1	3	4	2	3	2	2	.	2	3	2	1	4	2	1	2	1	20	3	2	1	0	0	0	0	0	0	0	0	1	2	0	0	0	0	0	0	0
1055	3	8	11	1	1	2	9	1	2	1	2	1	1	0	2	1	0	2	.	.	3	3	1	4	1	2	2	1	100	3	4	1	0	0	0	0	0	0	0	0	2	0	.	.	.	.	.	.	.
1056	3	8	0	1	2	.	.	1	1	1	2	1	2	3	2	4	2	2	.	2	1	4	1	4	2	1	1	1	40	3	2	1	1	1	1	1	1	1	0	0	2	0	.	.	.	.	.	.	.
1057	3	8	9	1	1	3	12	1	2	2	2	2	3	2	2	1	0	2	.	2	1	1	2	3	2	1	1	2	.	.	1	1	0	0	0	0	0	0	0	0	1	1	0	0	0	0	0	0	0
1059	3	8	12	1	1	2	9	1	1	1	1	1	1	2	2	2	1	2	.	.	1	1	3	4	1	3	1	2	.	.	4	1	1	1	1	1	1	1	0	0	1	1	1	1	1	1	1	1	1
1060	3	8	8	1	1	2	9	1	1	1	2	1	2	0	2	2	1	2	.	2	1	1	2	4	2	1	1	2	.	.	3	1	0	0	0	0	0	0	.	0	2	0	.	.	.	.	.	.	.
1061	3	8	10	1	1	3	12	1	2	2	1	.	2	0	2	1	0	2	.	2	1	1	1	4	1	2	2	1	75	1	4	1	1	1	1	1	1	1	1	0	2	0	.	.	.	.	.	.	.
1064	3	8	6	1	1	2	9	1	1	1	2	1	1	0	2	1	0	2	.	2	2	4	3	4	2	2	1	1	150	2	4	1	0	0	0	0	0	0	0	0	2	0	.	.	.	.	.	.	.
1065	3	8	9	1	1	2	9	1	2	1	2	1	4	3	2	1	0	2	.	2	1	1	2	4	2	1	2	2	.	.	4	1	1	1	1	1	1	1	0	0	1	1	1	1	1	1	1	0	0
1066	3	8	10	1	2	.	.	1	1	1	1	.	3	3	2	4	3	2	.	2	1	1	3	.	1	2	2	1	.	.	2	1	0	0	0	0	0	0	0	0	2	0	.	.	.	.	.	.	.
1067	1	5	11	1	1	3	13	1	2	2	1	.	4	0	1	1	0	1	3	1	2	1	3	4	1	3	.	1	38	1	4	1	0	0	0	0	0	0	0	0	2	0	.	.	.	.	.	.	.
1068	1	5	8	1	1	1	7	1	2	1	2	1	1	0	3	2	0	2	.	2	1	1	1	3	2	1	1	1	100	3	2	1	0	0	0	0	0	0	0	0	2	0	.	.	.	.	.	.	.
1075	1	3	12	1	1	3	12	1	1	1	2	1	1	1	2	2	1	2	.	2	1	2	3	4	2	1	1	1	100	3	1	1	0	0	0	0	0	0	0	0	1	1	0	0	0	0	0	0	0
1077	1	5	10	1	1	2	9	1	2	1	1	.	1	2	2	3	2	2	.	2	1	1	2	3	2	1	1	1	20	3	2	1	1	1	1	1	1	1	1	0	1	1	0	0	0	0	0	0	0
1078	1	5	11	1	1	1	3	1	2	1	2	1	0	2	2	5	2	2	.	1	2	1	2	4	2	1	1	1	.	4	2	1	0	0	0	0	0	0	0	0	1	2	0	0	0	0	0	0	0
1080	1	5	7	1	1	3	15	1	1	1	2	1	1	1	2	3	1	1	3	2	3	1	2	4	2	1	1	1	88	1	2	1	0	0	0	0	0	0	0	0	1	1	0	0	0	0	0	0	0
1083	1	3	8	1	2	.	.	1	1	1	2	1	1	3	2	5	3	2	.	2	1	1	3	4	1	3	1	1	.	.	1	1	1	1	1	1	0	0	0	0	2	0	.	.	.	.	.	.	.
1084	1	3	10	1	1	2	9	1	1	1	2	1	2	3	2	4	3	2	.	2	3	1	1	4	1	3	1	1	150	2	1	1	0	0	0	0	0	0	0	0	1	1	0	0	0	0	0	0	0
1088	1	5	9	1	1	3	11	1	1	2	2	1	1	0	2	5	1	1	3	1	2	2	2	3	2	1	1	1	.	4	2	1	0	0	0	0	0	0	0	0	2	0	.	.	.	.	.	.	.
1092	2	1	12	1	1	1	3	1	1	1	2	1	4	3	2	4	3	1	3	1	2	1	4	4	1	3	1	1	0	3	2	1	0	0	0	1	1	1	1	1	2	0	.	.	.	.	.	.	.
1093	2	1	11	1	1	2	9	1	1	1	2	1	1	2	2	5	2	1	3	1	2	1	3	4	2	1	1	1	600	1	4	2	0	0	0	0	0	0	0	0	2	0	.	.	.	.	.	.	.
1096	2	1	10	1	2	.	.	1	1	1	2	1	1	4	2	6	4	1	3	1	1	1	1	1	1	1	1	1	.	.	4	1	1	0	0	0	0	1	0	0	2	0	.	.	.	.	.	.	.
1097	3	8	8	1	1	2	9	1	1	1	2	1	1	3	2	4	3	2	.	2	3	1	4	4	1	1	1	1	80	4	1	1	0	0	1	1	0	0	0	0	1	1	0	1	0	0	0	0	0
1102	1	5	8	1	1	2	9	1	1	1	2	1	1	3	2	6	3	1	3	2	2	1	1	1	1	1	1	1	.	.	4	1	0	1	0	0	1	1	1	0	2	0	.	.	.	.	.	.	.
1103	1	5	10	1	1	1	3	1	1	1	2	1	1	1	2	3	1	2	.	2	2	1	4	1	2	1	2	2	.	.	4	1	0	0	0	0	0	0	0	0	2	0	.	.	.	.	.	.	.
1105	3	8	12	1	1	3	11	1	2	2	2	1	4	3	2	1	0	1	3	2	1	1	2	3	2	3	2	2	.	.	4	1	1	0	0	0	1	1	0	0	1	2	1	1	0	0	0	0	0
1106	3	8	12	1	1	3	12	1	1	1	2	1	2	1	2	3	1	2	.	.	4	1	2	3	2	1	1	1	100	1	1	1	0	0	0	0	0	0	0	0	1	1	0	0	0	0	0	0	0
1107	1	6	5	1	1	4	16	1	1	1	2	1	0	0	1	1	0	1	3	1	2	1	4	4	2	1	1	1	0	1	1	2	0	0	0	0	0	0	0	0	2	0	.	.	.	.	.	.	.
1110	3	8	12	1	1	2	9	1	2	2	2	2	2	0	2	1	0	2	.	2	2	2	2	4	2	2	2	1	.	4	1	1	0	0	1	0	0	0	0	0	2	0	.	.	.	.	.	.	.
1111	2	1	10	1	1	2	9	1	1	1	2	1	1	3	2	3	2	1	3	1	2	3	4	3	1	2	1	2	.	1	1	1	0	0	0	0	0	0	0	0	1	1	0	0	0	0	0	0	0
1116	3	8	5	1	1	1	8	1	2	2	2	1	3	4	2	1	0	2	.	2	1	1	3	4	2	1	1	1	.	.	1	1	1	0	0	0	0	0	0	0	2	0	.	.	.	.	.	.	.
1216	4	2	12	1	1	4	20	1	1	2	1	4	0	1	2	3	1	1	3	2	1	1	3	3	1	1	1	1	100	1	4	2	0	0	0	0	0	0	0	0	1	1	0	0	0	0	0	0	0
1217	3	8	5	1	1	3	12	1	1	1	2	1	3	1	2	2	1	1	3	2	3	1	1	3	1	1	1	1	75	1	2	2	0	0	0	1	1	0	0	1	1	1	0	0	0	0	0	0	0
1218	3	8	4	1	1	2	7	1	1	1	1	.	21	0	2	4	3	2	.	2	1	1	4	4	2	1	1	1	100	3	3	1	0	1	1	0	1	0	0	1	1	2	1	1	0	0	1	0	0
1219	3	8	4	1	1	2	9	1	1	1	2	1	3	2	2	3	2	2	.	2	1	1	3	4	1	1	1	1	30	2	1	1	1	1	1	1	1	1	1	1	2	0	.	.	.	.	.	.	.
1220	1	6	9	1	1	2	9	1	1	2	2	1	1	4	2	8	1	2	.	2	1	1	1	4	2	2	1	1	150	1	2	2	0	0	0	0	0	0	0	0	1	1	0	0	0	0	0	0	0
1222	3	8	8	1	1	2	9	1	2	2	2	1	4	5	2	1	0	2	.	2	3	3	1	4	1	1	2	1	80	1	1	1	0	0	0	0	0	0	0	0	1	1	0	0	0	0	0	0	0
1223	2	2	12	1	1	2	9	1	1	1	2	1	4	2	2	4	2	1	3	1	1	1	4	3	1	3	1	1	0	4	4	1	1	1	1	.	.	.	.	0	1	1	0	0	0	0	0	0	0
1225	3	8	8	1	1	1	4	2	2	2	2	2	1	0	2	2	0	2	.	2	1	1	3	4	1	1	1	2	.	.	2	1	1	0	0	0	1	1	1	1	2	0	.	.	.	.	.	.	.
1226	1	6	10	1	2	.	.	1	1	1	2	1	2	3	2	4	3	2	.	2	1	1	3	3	1	1	1	1	.	4	3	1	1	0	0	1	1	0	0	0	1	2	1	1	0	0	0	0	0
1227	1	6	8	1	1	4	16	1	1	1	2	1	2	2	2	4	1	2	.	2	1	2	3	3	1	3	1	1	225	1	4	2	1	1	1	0	1	1	0	0	1	1	0	0	0	0	0	0	0
1228	3	8	0	1	1	1	8	1	1	1	2	1	2	0	2	1	0	2	.	2	1	1	4	3	1	1	2	1	50	3	4	1	0	0	1	1	0	0	0	0	2	0	.	.	.	.	.	.	.
1229	3	8	8	1	1	2	11	3	2	2	2	1	3	3	2	1	0	2	.	2	2	1	1	2	1	1	1	2	.	.	4	1	0	0	0	0	0	0	0	0	1	2	0	0	0	0	0	0	0
1230	3	8	8	1	1	2	9	1	1	1	2	1	2	2	2	4	2	1	3	2	1	1	3	3	1	1	1	1	40	3	1	1	0	0	0	0	0	0	0	0	1	2	0	0	0	0	0	0	0
1231	3	8	9	1	1	1	6	1	1	2	1	.	5	1	2	2	0	2	.	2	1	1	4	3	1	1	2	1	50	3	3	1	1	1	1	1	1	1	1	0	2	0	.	.	.	.	.	.	.
1232	3	8	9	1	1	1	8	1	2	1	2	2	6	3	2	4	1	2	.	2	1	1	1	2	1	1	1	2	.	.	2	1	0	0	0	0	0	0	0	0	1	2	0	0	0	0	0	0	0
1234	1	6	7	1	1	4	16	1	1	1	2	1	1	0	2	1	0	1	3	2	1	1	4	4	2	1	1	1	800	3	3	2	0	0	0	0	0	0	0	0	2	0	.	.	.	.	.	.	.
1235	3	8	11	1	1	2	9	1	1	1	2	1	1	2	2	4	2	2	.	2	3	1	2	3	1	3	1	2	.	.	1	1	0	0	0	0	0	0	0	0	2	0	.	.	.	.	.	.	.
1236	3	8	8	1	1	4	13	1	1	1	2	1	2	1	1	2	0	2	.	2	3	2	4	4	1	2	1	1	500	1	2	2	0	0	0	0	0	0	0	0	2	0	.	.	.	.	.	.	.
1237	3	8	8	1	1	1	6	1	2	1	2	2	5	6	2	3	2	2	.	1	4	4	3	4	1	1	1	1	100	1	2	2	0	0	0	1	1	1	1	1	1	2	1	1	1	1	1	1	0
1238	3	8	11	1	2	.	.	1	1	1	2	1	5	9	2	7	3	2	.	2	1	1	4	2	1	2	1	1	50	2	2	1	0	0	0	0	1	1	1	1	1	5	1	1	1	1	1	1	0
1239	3	8	4	1	1	3	13	1	1	1	2	1	4	2	2	2	1	2	.	2	1	2	3	4	1	2	1	1	300	1	1	1	0	0	0	0	0	0	0	0	2	0	.	.	.	.	.	.	.
1243	4	2	9	1	1	2	9	1	1	1	2	1	1	0	2	1	0	2	.	1	1	1	2	3	2	1	1	2	.	.	4	1	0	0	0	0	0	0	0	0	2	0	.	.	.	.	.	.	.
1244	3	8	12	1	1	2	9	1	1	1	2	1	4	4	2	3	1	2	.	2	1	1	3	4	2	1	1	1	80	2	1	1	1	0	0	1	1	1	1	0	1	2	0	0	0	1	1	0	0
1246	3	8	12	1	1	2	9	1	2	1	2	1	6	3	2	3	2	2	.	2	1	1	1	4	1	1	2	1	70	2	3	1	0	1	0	1	0	1	0	1	1	1	0	0	0	0	0	0	0
1247	3	8	12	1	1	2	8	1	2	2	2	2	2	1	1	1	0	2	.	2	2	1	1	4	1	1	1	1	60	1	4	1	1	1	1	1	1	1	1	0	2	0	.	.	.	.	.	.	.
1249	3	8	0	1	1	3	12	1	1	1	1	1	2	3	2	2	1	2	.	2	3	1	4	2	1	3	2	1	30	3	2	1	0	0	0	0	0	0	0	0	1	1	0	0	0	0	0	0	0
1252	3	8	11	1	2	.	.	1	2	1	2	1	2	4	2	5	4	2	.	2	1	1	1	4	1	1	2	1	.	4	3	1	1	1	1	1	1	1	1	1	2	0	.	.	.	.	.	.	.
1253	1	6	11	1	1	3	12	1	1	1	2	1	2	1	2	3	1	2	.	2	1	1	2	4	1	2	1	1	80	1	2	1	0	0	0	0	0	0	0	0	1	1	0	0	0	0	0	0	0
1256	3	8	7	1	1	2	9	1	2	1	2	1	2	2	2	4	2	2	.	2	1	1	2	3	1	1	1	1	80	3	2	1	0	0	0	0	0	0	0	0	2	0	.	.	.	.	.	.	.
1257	3	8	8	1	1	1	5	1	2	2	2	2	2	5	2	2	1	2	.	2	1	1	3	4	2	1	2	1	25	3	1	1	0	0	0	0	0	0	0	0	1	2	0	0	0	0	0	0	0
1261	3	8	12	1	1	2	12	1	2	1	2	1	1	4	2	5	3	2	.	2	1	1	2	4	2	1	1	1	30	3	2	1	1	1	1	1	1	1	1	1	1	1	0	0	0	0	0	0	0
1263	3	8	0	1	1	2	9	1	1	1	2	1	1	2	2	4	2	2	.	.	1	1	4	3	1	2	1	1	50	2	1	1	0	0	0	0	0	0	0	0	2	0	.	.	.	.	.	.	.
1266	1	5	12	1	1	1	6	1	1	1	2	1	1	2	2	3	2	2	.	2	1	1	1	4	2	2	1	1	0	4	1	1	0	0	0	0	0	0	0	0	2	0	.	.	.	.	.	.	.
1267	2	1	10	1	1	2	9	1	1	1	2	1	2	1	2	3	1	1	3	1	1	1	3	4	1	3	1	2	.	.	4	1	1	0	0	0	0	0	0	0	1	1	0	0	0	0	0	0	0
1268	2	1	12	1	1	1	4	1	2	2	2	2	2	6	2	3	0	1	3	1	4	1	3	3	2	1	1	1	0	.	2	1	1	1	1	1	1	1	1	1	1	2	1	1	1	1	1	1	1
1269	1	3	11	1	1	2	9	1	1	1	1	.	5	3	2	3	2	1	3	1	1	1	4	4	2	1	1	1	70	3	1	1	1	1	1	0	0	0	0	0	1	1	0	0	0	0	0	0	0
1271	1	7	11	1	1	3	12	1	1	1	2	1	1	0	2	1	0	1	3	1	3	1	2	4	1	2	1	1	.	.	1	1	0	0	0	0	0	0	0	0	2	0	.	.	.	.	.	.	.
1272	1	3	11	1	1	2	9	1	1	1	2	1	1	0	3	1	0	2	.	1	3	1	1	1	1	1	1	1	150	1	2	1	1	0	0	0	0	0	0	0	2	0	.	.	.	.	.	.	.
1273	1	3	11	1	1	4	16	1	1	1	2	1	1	3	2	4	2	2	.	1	1	1	1	4	1	1	1	1	500	2	4	2	0	0	0	0	0	0	0	0	1	1	0	0	0	0	0	0	0
1274	1	6	9	1	1	3	12	1	2	1	2	1	1	0	2	4	0	1	1	1	1	1	1	4	1	3	1	1	0	4	1	1	0	0	0	0	0	0	0	0	2	0	.	.	.	.	.	.	.
1275	1	6	10	1	1	4	18	1	1	1	2	.	1	2	1	4	2	2	.	1	4	1	3	4	2	1	1	1	1000	1	2	4	0	0	0	0	0	0	0	0	1	2	0	0	0	0	0	0	0
1276	1	6	12	1	1	4	16	1	1	1	2	1	2	0	2	1	0	1	3	1	4	1	4	4	1	3	1	1	225	1	4	2	0	0	0	0	0	0	0	0	2	0	.	.	.	.	.	.	.
1277	1	6	6	1	1	3	13	1	2	2	1	.	1	0	2	2	0	2	.	1	2	1	3	4	2	1	1	2	.	.	1	1	0	0	1	0	1	0	1	1	2	0	.	.	.	.	.	.	.
1279	2	1	10	1	1	2	9	1	1	1	2	1	1	3	2	5	4	1	3	1	1	1	4	1	2	1	1	2	.	4	4	1	0	0	0	0	0	0	0	0	1	1	0	0	0	0	0	0	0
1280	2	1	8	1	1	2	9	1	1	1	2	1	1	2	2	3	2	1	3	1	1	1	2	4	1	1	1	1	0	3	1	2	0	0	0	0	0	0	0	0	1	1	0	0	0	0	0	0	0
1281	1	7	12	1	1	1	8	1	1	1	2	2	2	4	3	3	2	2	.	1	1	1	1	2	1	3	1	1	.	.	2	1	0	0	1	1	1	1	0	0	1	2	1	1	0	1	1	0	0
1282	2	1	8	1	1	3	12	1	1	1	2	1	4	2	2	4	2	1	3	1	2	1	1	4	2	1	1	1	0	3	3	4	0	0	0	0	0	0	0	0	1	1	0	0	0	0	0	0	0
1283	1	5	6	1	1	4	19	1	1	2	1	.	0	2	2	3	2	2	.	2	4	1	4	4	1	3	1	1	.	1	2	3	0	0	0	0	0	0	0	0	1	2	0	0	0	0	0	0	0
1287	3	8	5	1	1	2	9	1	2	1	2	1	1	2	2	3	2	2	.	2	1	1	1	3	1	3	1	1	70	3	2	1	0	0	0	0	0	0	0	0	2	0	.	.	.	.	.	.	.
1289	3	8	8	1	1	2	9	1	2	1	1	.	2	6	2	6	4	2	.	2	1	1	3	4	2	1	1	1	.	.	2	1	1	1	1	1	1	1	1	1	1	1	1	1	1	1	1	0	0
1290	3	8	10	1	2	.	.	1	1	1	2	1	1	3	2	5	3	2	.	2	3	1	2	3	1	3	2	1	50	2	4	1	1	0	1	0	0	0	0	0	2	0	.	.	.	.	.	.	.
1291	3	8	7	1	1	2	9	1	2	1	2	1	1	0	2	2	0	2	.	2	1	1	3	4	2	1	1	2	.	.	3	1	0	0	0	0	0	0	0	0	2	0	.	.	.	.	.	.	.
1292	1	3	12	1	1	4	14	1	1	1	2	1	1	0	1	1	0	2	.	1	1	2	3	4	2	1	1	1	300	1	4	3	0	0	0	0	0	0	0	0	2	0	.	.	.	.	.	.	.
1298	3	8	5	1	1	2	9	1	1	1	2	3	3	5	2	2	1	2	.	2	1	1	3	3	2	1	2	1	.	.	3	1	1	1	1	1	1	1	0	1	2	0	.	.	.	.	.	.	.
1299	2	1	8	1	1	2	9	1	1	1	2	1	1	3	2	4	3	2	.	2	1	1	2	3	2	1	1	1	.	.	3	1	0	0	0	0	0	0	0	0	1	1	0	0	0	0	0	0	0
1300	2	1	8	1	1	3	12	1	1	1	2	1	1	1	2	2	1	2	.	1	1	1	2	2	2	1	1	1	50	3	5	1	0	0	0	0	0	0	0	0	1	1	0	0	0	0	0	0	0
[truncated: 5 more columns]
