# Supplementary material for: The prevalence of anemia and iron deficiency among pregnant Ghanaian women, a longitudinal study
Source: PLoS One. 2021 Mar 24;16(3):e0248754. doi: 10.1371/journal.pone.0248754 (PMC7990185; doi:10.1371/journal.pone.0248754)
Supplement: S2 Data — (CSV) [file pone.0248754.s002.csv]

ID	Trimester	Fe	TIBC	TSAT	Ft, adjusted	Hemoglobin	Fe category, 1st trimester	TIBC category, 1st trimester	TSAT category, 1st trimester	Ft category, 1st trimester	Hb category, 1st trimester	AGP	AGP category, 1st trimester	CRP	CRP category, 1st trimester
1002	1	76.14	305	24.96	76.2	13.5	0	0	0	0	0	93.6698878	0	0.172839506	0
1002	2	72.59	358.79	20.23	28.98	10.9	0	0	0	0	0	70.82718805	0	3.481769367	0
1002	3	46.73	451.61	10.35	22.3	10.1	0	0	0	0	0	43.4410186	0	6.419482215	1
1003	1	104.74	408.68	25.63	123.22	11.4	0	1	0	0	0	32.44890157	0	2.028149664	0
1008	3	120.85	377	32.05	25.33	10.7						43.4410186	0	5.010718443	1
1009	1	92.91	441.37	21.05	51.04	10.6	0	1	0	0	1	35.39973411	0	2.657357592	0
1010	1	140.21			20.51	10.8	0		1	0	1	75.30087105	0	5.221857306	1
1010	2	48.81	314.15	15.54	4.53	8.7						45.11282253	0	8.323474398	1
1010	3	50.25	366.4	13.71	7.26	11.4	0		1	0	1	30.20299425	0	6.419482215	1
1012	1	4.91	455.61	1.08	1.86	9.8	1	1	1	1	1	106.6191155	1	0.172839506	0
1013	1	161.38	352.63	45.76	62.64	12.7	0	0	0	0	0	90.93896352	0	2.028149664	0
1014	2	136.55			51.23	12.3						45.11282253	0	2.088574546	0
1015	1	143.5	359.98	39.86	54.26	11.2	0	0	0	0	0	106.6191155	1	0.172839506	0
1015	2	151.1	405.29	37.28	17.3	11.1	0	0	0	0	0	44.26902938	0	0.172839506	0
1015	3	135.71	430.22	31.54	4.74	11.2	0	0	0	0	0	25.18401678	0	3.911109724	0
1016	1	111.86	379.9	29.44	193.34	12.7	0	0	0	0	0	53.6154555	0	2.028149664	0
1016	2	118.12	245.66	48.08	80.46	9.7	0	0	0	0	0	45.11282253	0	3.355038578	0
1016	3	72.19	377	19.15	18.09	9.5	0	0	0	0	0	21.96342169	0	3.481769367	0
1017	1	203.5	366.26	55.56	12.27	13.1	0	0	0	1	0	74.94626597	0	7.055048441	1
1017	2	68.69	279.71	24.56	15.5	10.9	0	0	0	1	0	37.19418099	0	13.80336685	1
1017	3	57.06	408.89	13.96	6.02	11.5	0	0	0	1	0	39.44118911	0	3.481769367	0
1018	1	85.75	332.21	25.81	36.58	11	0	0	0	0	0	233.6146102	1	3.041760389	0
1019	1	81.34	438.69	18.54	36.5	11	0	1	0	0	0	58.27066843	0	13.44466545	1
1019	3	105.94	456.97	23.18	3.12	11.4	0	1	0	0	0	43.4410186	0	5.010718443	1
1021	1	121.78	243.22	50.07	8.32	8.9	0	0	0	1	1	136.338564	1	0.172839506	0
1021	2	56.84	286.57	19.84	17.55	10.6	0	0	0	1	1	45.11282253	0	10.36930091	1
1023	1	79.72	359.98	22.15	12.75	10.3	0	0	0	1	1	136.338564	1	10.62962963	1
1024	1	150.76	314.05	48.01	260.8	11.3	0	0	0	0	0	32.44890157	0	2.028149664	0
1027	1	128.8	348.83	36.92	71.1	10.7	0	0	0	0	1	79.27722301	0	0.172839506	0
1028	1	147.8	346.28	42.68	54.96	11.1	0	0	0	0	0	92.6509748	0	0.172839506	0
1028	2	72.59	398.2	18.23	17.66	9.9	0	0	0	0	0	45.11282253	0	4.816343231	0
1034	1	99.55	387.34	25.7	72.85	11.8	0	0	0	0	0	89.88247032	0	12.6219077	1
1035	1	128.8	380.5	33.85	25.18	11.3	0	0	0	0	0	107.7953433	1	2.781634089	0
1037	1	102.21	455.61	22.43	43.23	12	0	1	0	0	0	107.7953433	1	7.055048441	1
1037	2	136.55	355.95	38.36	21.03	9.6	0	1	0	0	0	66.36666586	0	4.816343231	0
1037	3	85.75	357.22	24.01	28.33	8.7	0	1	0	0	0	30.66549645	0	5.977230447	1
1038	1	124.57	411.51	30.27	77.41	10.8	0	1	0	0	1	32.44890157	0	5.977230447	1
1038	2	99.4	238.9	41.61	40.57	11.6	0	1	0	0	1	45.11282253	0	8.323474398	1
1038	3	88.01	272.87	32.25	98.54	11.7	0	1	0	0	1	30.43336677	0	3.214814815	0
1039	1	124.57	394.18	31.6	30.35	10.1	0	0	0	0	1	264.184949	1	0.37609084	0
1039	2	110.67	334.99	33.04	8.84	8.4	0	0	0	0	1	25.28279015	0	4.816343231	0
1039	3	32.33	300.33	10.76	12.81	9.1	0	0	0	0	1	11.92545615	0	3.214814815	0
1040	1	156.34	496.48	31.49	16.25	11.1	0	1	0	0	0	136.338564	1	0.172839506	0
1041	1	48.05	339.43	14.16	11.79	8.4	1	0	1	1	1	54.31288635	0	0.172839506	0
1041	3	81.07	371.7	21.81	38.36	11.5	1	0	1	1	1	2.073003331	0	2.781634089	0
1044	1	130.52	353.13	36.96	31.71	11.1	0	0	0	0	0	43.44852125	0	2.781634089	0
1044	2	60.81	321.08	18.94	32.75	11	0	0	0	0	0	66.36666586	0	8.323474398	1
1047	1	102.9	325.4	31.62	68.25	14	0	0	0	0	0	68.34706205	0	5.323533606	1
1047	3	146.54	510.69	28.7	14.65	10.9	0	0	0	0	0	26.85344446	0	3.460190425	0
1048	1	101.18	299.17	33.82	163.42	10.4	0	0	0	0	1	70.82718805	0	5.977230447	1
1053	1	117.38	243.22	48.26	55.38	13.5	0	0	0	0	0	129.2781117	1	5.59049161	1
1053	2	109.67	508.92	21.55	6.52	11.3	0	0	0	0	0	62.4812918	0	2.382868082	0
1053	3	82.53	300.54	27.46	4.74	11	0	0	0	0	0	142.7578504	1	7.749969619	1
1054	1	72.19	352.63	20.47	67.32	9.4	0	0	0	0	1	30.20821057	0	11.23569651	1
1054	2	121.67	353.81	34.39	23.63	8.1	0	0	0	0	1	25.18401678	0	2.382868082	0
1055	1	57.79	401.01	14.41	19.13	12.8	1	1	1	0	0	107.7953433	1	2.781634089	0
1055	3	67.44	579.46	11.64	24.89	9.5	1	1	1	0	0	40.77556618	0	5.178452536	1
1056	1	112.96	284.53	39.7	71.41	12.2	0	0	0	0	0	66.4978602	0	0.172839506	0
1056	2	87.23	388.7	22.44	76.23	10.7	0	0	0	0	0	36.22221466	0	2.382868082	0
1056	3	148.11	361.11	41.02	59.19	9.7	0	0	0	0	0	2.406601411	0	4.052605353	0
1057	1	90.51	270.77	33.43	216.76	12.6	0	0	0	0	0	74.94626597	0	3.12481996	0
1057	2	117.12	309.09	37.89	81.29	10.8	0	0	0	0	0	43.4410186	0	17.294181	1
1059	1				26.12	11.9				0	0	32.44890157	0	2.028149664	0
1059	2	109.67	457.53	23.97	28.3	11.7				0	0	30.20299425	0	2.382868082	0
1060	1	157.86	298.21	52.94	24.85	12.9	0	0	0	0	0	51.62974737	0	2.028149664	0
1060	2	79.72	359.72	22.16	7.2	11.2	0	0	0	0	0	89.8669495	0	2.382868082	0
1060	3	158.41	414.22	38.24	12.57	11.4	0	0	0	0	0	2.073003331	0	2.781634089	0
1061	1	82.18	325.4	25.25	106.98	10.7	0	0	0	0	1	51.62974737	0	3.041760389	0
1061	2	90.98	537.08	16.94	33.83	11.4	0	0	0	0	1	32.44890157	0	2.028149664	0
1061	3	82.53	339.97	24.27	51.52	10.3	0	0	0	0	1	1.981983342	0	7.055048441	1
1064	1	86.9	368.75	23.56	204.92	12.9	0	0	0	0	0	70.82718805	0	2.028149664	0
1064	2	106.86	438.1	24.39	38.44	11.6	0	0	0	0	0	154.5966219	1	2.028149664	0
1065	1	101.18	388.7	26.03	86.48	10.8	0	0	0	0	1	104.6405467	1	3.481769367	0
1065	3	92	478.42	19.23	36.15	8.9	0	0	0	0	1	61.91558776	0	5.178452536	1
1066	2	95.62	314.15	30.44	45.13	10.1						36.7049807	0	0.172839506	0
1066	3	214.23	403.57	53.08	43.78	11.4						2.073003331	0	2.781634089	0
1067	1	161.38	571.6	28.23	176.4	9.5	0	1	0	0	1	132.6325135	1	2.657357592	0
1067	2	95.89	279.34	34.33	108.56	9.6	0	1	0	0	1	66.36666586	0	3.481769367	0
1068	1	108.3	482.43	22.45	195.79	12.9	0	1	0	0	0	53.39185379	0	0.172839506	0
1075	1	118.96	305	39	236.57	11.8	0	0	0	0	0	160.1769427	1	2.028149664	0
1075	3	99.97			15.16	9.8	0	0	0	0	0	2.406601411	0	6.521818052	1
1077	1	101.99	333.91	30.54	164.59	14	0	0	0	0	0	62.49208287	0	2.781634089	0
1077	2	85.63	374.5	22.87	47.41	11.7	0	0	0	0	0	26.85344446	0	5.178452536	1
1078	1	126.06	352.63	35.75	84.31	11.2	0	0	0	0	0	75.30087105	0	2.028149664	0
1078	2	144.17	418.6	34.44	35.27	10.2	0	0	0	0	0	26.85344446	0	3.460190425	0
1080	1	46.78	336.1	13.92	55.43	5.4	1	0	1	0	1	97.17737507	0	3.538343568	0
1080	2	64.76	377.02	17.18	26.82	9.6	1	0	1	0	1	53.7257653	0	0.172839506	0
1080	3	77.6	294.75	26.33	7.05	10.7	1	0	1	0	1	44.26902938	0	10.43696612	1
1083	1	85.94	482.32	17.82	7.41	11.3	0	1	0	1	0	82.41900055	0	3.538343568	0
1083	2	139.42	529.88	26.31	29.54	11.3	0	1	0	1	0	2.073003331	0	8.903279349	1
1084	1	72.76	309.09	23.54	4.68	10.8	0	0	0	1	1	104.6405467	1	10.26124365	1
1092	1	62.95	343.15	18.35	186.25	10.4	0	0	0	0	1	97.17737507	0	3.538343568	0
1092	2	175.66	246.93	71.14	98.02	9.5	0	0	0	0	1	53.39185379	0	1.585185185	0
1093	1	49.99	364.24	13.73	141.81	8.7	1	0	1	0	1	181.265788	1	9.824263448	1
1093	2	68.69	238.9	28.75	9.87	9.4	1	0	1	0	1	36.7049807	0	0.172839506	0
1093	3	53.92	451.61	11.94	6.72	10.9	1	0	1	0	1	2.073003331	0	2.781634089	0
1096	1	105.89	289.26	36.61	19.84	11.2	0	0	0	0	0	58.27066843	0	3.481769367	0
1096	2	143.86	307.23	46.82	11.24	11.5	0	0	0	0	0	53.39185379	0	0.172839506	0
1096	3	55.09	398.24	13.83	6.36	9.9	0	0	0	0	0	2.073003331	0	7.055048441	1
1102	1	114.18	364.24	31.35	59	11.7	0	0	0	0	0	45.11282253	0	2.028149664	0
1102	2	208.31	374.5	55.62	69.45	11.1	0	0	0	0	0	61.91558776	0	3.460190425	0
1102	3	177.56			49.74	11.2	0	0	0	0	0	3.402503984	0	2.628915148	0
1103	1	46.78	406.17	11.52	6.81	9.2	1	1	1	1	1	45.11282253	0	3.481769367	0
1103	3	88.8	256.17	34.67	7.57	10.7	1	1	1	1	1	2.406601411	0	0.827057232	0
1105	1	67.9	307.81	22.06	62.88	10.4	0	0	0	0	1	97.63375666	0	2.028149664	0
1106	1	69.48	336.1	20.67	11.25	11.1	0	0	0	1	0	45.11282253	0	3.481769367	0
1106	2	184.54	452.67	40.77	8	10.7	0	0	0	1	0	26.85344446	0	11.59845121	1
1106	3	77.6	424.88	18.26	15.09	11.4	0	0	0	1	0	2.719599363	0	0.827057232	0
1107	1	79.34	250.68	31.65	220.86	12.7	0	0	0	0	0	97.63375666	0	2.028149664	0
1107	2	217.81	374.5	58.16	132.65	11.3	0	0	0	0	0	26.85344446	0	3.460190425	0
1110	1	56.46	371.25	15.21	16.84	11.5	1	0	1	0	0	45.11282253	0	2.028149664	0
1111	1	53.22	321.98	16.53	11.5	12.4	1	0	0	1	0	37.19418099	0	13.44466545	1
1111	2	76.52	330.02	23.19	41.33	12.2	1	0	0	1	0	1.894959795	0	2.781634089	0
1111	3	136.37	313.65	43.48	25.13	11.9	1	0	0	1	0	2.112573033	0	0.827057232	0
1116	1	102.55	250.68	40.91	210.61	9.3	0	0	0	0	1	45.11282253	0	7.831591025	1
1216	1	152.07	423.68	35.89	20.83	8	0	1	0	0	1	32.44890157	0	10.26124365	1
1216	2	95.62	341.96	27.96	54.53	11.3	0	1	0	0	1	211.3002447	1	4.816343231	0
1216	3	46.78	578.11	8.09	30.65	9.2	0	1	0	0	1	66.36666586	0	2.028149664	0
1217	1	164.9	345.82	47.68	119.72	11.4	0	0	0	0	0	62.35194423	0	3.481769367	0
1218	1	124.57	325.72	38.24	54.23	11.3	0	0	0	0	0	106.6191155	1	0.172839506	0
1218	2	80.34	232.15	34.6	26.41	10.3	0	0	0	0	0	211.3002447	1	12.60996805	1
1219	1	126.37	311.8	40.53	81.16	11.9	0	0	0	0	0	89.88247032	0	5.59049161	1
1219	2	80.34	259.23	30.99	63.26	10.8	0	0	0	0	0	97.63375666	0	2.088574546	0
1219	3	100.08	334.7	29.9	34.13	10.1	0	0	0	0	0	30.20299425	0	2.697118326	0
1222	1	116.61	259.59	44.92	293.43	7.6	0	0	0	0	1	89.88247032	0	4.429961991	0
1222	2	95.62	419.49	22.79	25.18	9.3	0	0	0	0	1	45.11282253	0	8.323474398	1
1222	3	109.67	389.44	28.16	27.45	11.4	0	0	0	0	1	43.4410186	0	8.224320001	1
1223	1	131.99	237.19	55.65	370.31	13.7	0	0	0	0	0	75.30087105	0	3.481769367	0
1223	2	95.62	266.04	35.94	167.95	9.3	0	0	0	0	0	97.63375666	0	2.088574546	0
1225	1	101.18	339.01	29.85	40.49	10	0	0	0	0	1	51.62974737	0	5.221857306	1
1225	3	107.26	440.88	24.33	11.92	9.9	0	0	0	0	1	43.4410186	0	10.53658803	1
1226	1	143.5	366.82	39.12	80.23	11.7	0	0	0	0	0	342.2943414	1	0.172839506	0
1228	1	82.18	339.01	24.24	25.08	11.4	0	0	0	0	0	35.39973411	0	10.26124365	1
1228	2	56.84	405.29	14.02	12.92	11.6	0	0	0	0	0	45.11282253	0	11.4652794	1
1228	3	160.52	420.26	38.2	12.2	9.2	0	0	0	0	0	43.4410186	0	8.224320001	1
1229	1	94.05	298.21	31.54	188.76	10.3	0	0	0	0	1	160.1769427	1	10.26124365	1
1229	2	114.4	341.96	33.45	60.65	11.2	0	0	0	0	1	45.11282253	0	8.323474398	1
1229	3	113.4	394.57	28.74	13.54	13.1	0	0	0	0	1	43.4410186	0	8.224320001	1
1230	1	109.3	298.21	36.65	77.69	10.5	0	0	0	0	1	185.9409305	1	4.976511363	0
1231	1	38.05	270.77	14.05	24.02	12	1	0	1	0	0	168.4355682	1	10.62962963	1
1231	2	68.69	398.2	17.25	17.03	10	1	0	1	0	0	54.71734294	0	4.061335827	0
1232	1	79.73	325.4	24.5	145.96	12.5	0	0	0	0	0	62.49208287	0	2.781634089	0
1232	2	99.4	307.23	32.35	75.06	10.4	0	0	0	0	0	97.63375666	0	2.088574546	0
1232	3	175.16	409.97	42.72	53.12	9.3	0	0	0	0	0	36.22221466	0	2.697118326	0
1234	1	189.81	339.43	55.92	13.13	12.5	0	0	0	1	0	92.6509748	0	0.172839506	0
1235	1	67.33	407.84	16.51	76.64	11.7	0	1	0	0	0	92.6509748	0	0.172839506	0
1235	2	76.47	286.57	26.69	58.84	10.2	0	1	0	0	0	66.36666586	0	2.088574546	0
1236	1	145.88	398.69	36.59	13.46	12.7	0	0	0	1	0	54.31288635	0	9.407407407	1
1236	3	209.35	420.26	49.81	59.2	11.5	0	0	0	1	0	32.44890157	0	2.028149664	0
1237	1	147.8	325.72	45.38	126.91	10.7	0	0	0	0	1	106.6191155	1	0.172839506	0
1238	1	146.82	366.82	40.03	71.65	12.5	0	0	0	0	0	74.94626597	0	8.903279349	1
1238	2	153.67	462.37	33.23	61.26	10.7	0	0	0	0	0	66.36666586	0	2.088574546	0
1238	3	92.57	357.22	25.91	48.92	10	0	0	0	0	0	37.19418099	0	3.481769367	0
1239	1	139.19	632.3	22.01	25.21	9.7	0	1	0	0	1	92.6509748	0	0.172839506	0
1243	1	126.16	318.86	39.57	53.71	10.7	0	0	0	0	1	54.31288635	0	7.125925926	1
1244	1	117.38	305.14	38.47	58.98	12.2	0	0	0	0	0	66.4978602	0	4.111111111	0
1246	1		462.42		189.42	12		1		0	0	52.10747154	0	2.781634089	0
1247	1	164.82	380.5	43.32	186.53	7.3	0	0	0	0	1	121.1816453	1	1.585185185	0
1249	1	84.94	338.89	25.06	145.71	12.5	0	0	0	0	0	52.10747154	0	3.12481996	0
1249	3	106.93	348.95	30.64	35.33	10.3	0	0	0	0	0	30.43336677	0	0.172839506	0
1252	1	110.96	318.86	34.8	85.95	8.4	0	0	0	0	1	74.94626597	0	2.781634089	0
1253	1	16.85	394.18	4.27	20.6	14.3	1	0	1	0	0	107.7953433	1	4.429961991	0
1253	2	45.65	549.05	8.31	15.93	10.5	1	0	1	0	0	30.20299425	0	3.911109724	0
1253	3	180.81	300.5	60.17	25.35	12.1	1	0	1	0	0	26.85344446	0	7.749969619	1
1256	1	154.33	352.63	43.77	16.54	12.2	0	0	0	0	0	43.44852125	0	7.925469518	1
1256	2	135.71	275.05	49.34	6.21	9.9	0	0	0	0	0	25.18401678	0	4.318570363	0
1256	3	77.65	389.44	19.94	5.82	10.2	0	0	0	0	0	2.073003331	0	2.781634089	0
1257	1				2.32	11.1				1	0	68.34706205	0	4.340102636	0
1257	2	112.96	457.53	24.69	4.31	9.6				1	0	43.4410186	0	2.382868082	0
1257	3	67.44	323.15	20.87	7.72	9.1				1	0	33.09024632	0	3.460190425	0
1261	1	90.47	332.21	27.23	37.55	11.1	0	0	0	0	0	198.1983342	1	0.172839506	0
1261	2	68.42	359.72	19.02	42.78	10	0	0	0	0	0	43.4410186	0	2.382868082	0
1261	3	113.33	394.57	28.72	41.84	11.8	0	0	0	0	0	1.894959795	0	2.781634089	0
1263	1	136.12	220.18	61.82	108.78	11.1	0	0	0	0	0	90.93896352	0	2.028149664	0
1263	2	94.73	541.3	17.5	44.8	10.2	0	0	0	0	0	70.82718805	0	3.481769367	0
1263	3	131.72	363.86	36.2	44.21	11.3	0	0	0	0	0	1.937983165	0	2.781634089	0
1266	1	54.51	325.4	16.75	34.65	10.5	1	0	0	0	1	64.39468158	0	0.172839506	0
1267	1	154.22	373.08	41.34	115.37	6.5	0	0	0	0	1	132.6325135	1	2.028149664	0
1267	2	111.74	379.42	29.45	36.96	11.3	0	0	0	0	1	40.77556618	0	3.460190425	0
1267	3	129.64	191.53	67.69	22.28	9.6	0	0	0	0	1	2.406601411	0	0.827057232	0
1268	1	39.96	427.69	9.34	342.31	12.4	1	1	1	0	0	51.62974737	0	2.028149664	0
1268	2	89.33	365.48	24.44	17.24	11.5	1	1	1	0	0	154.5966219	1	2.028149664	0
1268	3	151.8	466.72	32.52	9.46	9.3	1	1	1	0	0	2.406601411	0	0.827057232	0
1269	1	136.68	407.2	33.57	112.6	13.6	0	1	0	0	0	75.30087105	0	2.028149664	0
1269	2	202.02	413.58	48.85	71.13	12.5	0	1	0	0	0	44.26902938	0	0.172839506	0
1269	3	81.07	415.11	19.53	37.78	12.3	0	1	0	0	0	2.073003331	0	2.781634089	0
1271	1	175.16	348.83	50.21	19.51	11.4	0	0	0	0	0	75.30087105	0	2.028149664	0
1271	2	187.37	358.69	52.24	37.29	11.1	0	0	0	0	0	40.77556618	0	3.460190425	0
1271	3	192.58	338.38	56.91	48.68	11.7	0	0	0	0	0	2.406601411	0	3.318515091	0
1272	1	71.49	393.54	18.17	2.29	8.7	0	0	0	1	1	112.973088	1	0.172839506	0
1272	3	113.33	348.56	32.51	34.63	11	0	0	0	1	1	2.026982504	0	2.781634089	0
1273	1	60.84	434.53	14	47.01	11.2	0	1	1	0	0	93.6698878	0	3.214814815	0
1273	2	66.21	385.24	17.19	64.57	10.5	0	1	1	0	0	66.36666586	0	2.028149664	0
1273	3	101.68	577.08	17.62	17.01	11.1	0	1	1	0	0	2.026982504	0	2.781634089	0
1274	1	76.04	336.1	22.63	33.76	11.7	0	0	0	0	0	97.17737507	0	3.538343568	0
1274	2	32.33	314.15	10.29	21.82	10.9	0	0	0	0	0	64.39468158	0	4.111111111	0
1275	1	62.95	385.24	16.34	2.46	11.6	0	0	0	1	0	97.17737507	0	8.009400305	1
1275	3	115.01	487.46	23.59	8.39	10.9	0	0	0	1	0	2.049863772	0	2.781634089	0
1276	1	82.63	336.1	24.59	31.44	11.9	0	0	0	0	0	97.17737507	0	5.323533606	1
1276	2	91.82	391.13	23.48	6.53	12.4	0	0	0	0	0	30.43336677	0	0.172839506	0
1276	3	58.86	717.98	8.2	8.55	7.6	0	0	0	0	0	2.120069021	0	2.781634089	0
1277	1	30.88	427.03	7.23	3.01	11.4	1	1	1	1	0	128.7534322	1	3.538343568	0
1277	3	181.44	508.24	35.7	73.66	9.3	1	1	1	1	0	2.719599363	0	0.827057232	0
1279	1	99.55	259.59	38.35	109.24	10.8	0	0	0	0	1	181.265788	1	13.34596557	1
1279	2	189.29	402.76	47	29.14	9.8	0	0	0	0	1	26.85344446	0	3.460190425	0
1279	3	133.34	358.76	37.17	15.89	13.2	0	0	0	0	1	3.051566887	0	3.318515091	0
1280	1	89.25	343.15	26.01	73.84	11	0	0	0	0	0	128.7534322	1	5.323533606	1
1280	2	68.69	290.12	23.68	42.51	9.9	0	0	0	0	0	36.7049807	0	3.214814815	0
1280	3	92.53	338.38	27.34	8.4	10.4	0	0	0	0	0	1.837514227	0	8.390411446	1
1281	1	112.59	392.23	28.7	29.02	9.5	0	0	0	0	1	68.34706205	0	3.538343568	0
1281	2	106.93	314.15	34.04	35.79	9.7	0	0	0	0	1	25.23335513	0	0.172839506	0
1282	1	139.55	392.23	35.58	120.09	11.4	0	0	0	0	0	112.6221856	1	3.538343568	0
1283	1	62.95	357.22	17.62	10.89	11.1	0	0	0	1	0	82.41900055	0	8.009400305	1
1283	2	52.84	606.29	8.72	8.43	10.5	0	0	0	1	0	47.94021749	0	7.831591025	1
1283	3	114.83	508.24	22.59	9.66	10.2	0	0	0	1	0	2.719599363	0	4.831185934	0
1287	1	59.7	357.22	16.71	23.58	10.3	1	0	0	0	1	82.41900055	0	3.538343568	0
1287	2	103.85	438.1	23.7	5.24	8.3	1	0	0	0	1	26.85344446	0	3.460190425	0
1287	3	71.97	492.65	14.61	4.6	11.2	1	0	0	0	1	2.406601411	0	1.983805524	0
1289	1	56.46	257.86	21.89	209.39	10.5	1	0	0	0	1	200.1427787	1	3.538343568	0
1289	2	139.42	257.62	54.12	26.43	8	1	0	0	0	1	40.77556618	0	4.233016877	0
1289	3	114.83	348.56	32.94	29	10.8	1	0	0	0	1	2.719599363	0	0.827057232	0
1290	1	66.21	329.04	20.12	74.61	8.2	0	0	0	0	1	97.17737507	0	8.009400305	1
1290	2	156.04	360.48	43.29	38.36	9	0	0	0	0	1	17.68479378	0	3.460190425	0
1290	3	96.25	294.75	32.66	20.1	8.6	0	0	0	0	1	2.406601411	0	7.43386959	1
1291	1	95.89	286.48	33.47	209.61	12.3	0	0	0	0	0	82.41900055	0	3.538343568	0
1291	3	136.66	333.3	41	93.05	10.6	0	0	0	0	0	2.073003331	0	2.781634089	0
1292	1	56.46	329.04	17.16	141.12	11.8	1	0	0	0	0	54.71734294	0	3.481769367	0
1292	2	76.52	541.3	14.14	60.51	11.8						40.77556618	0	3.460190425	0
1292	3	113.2	323.15	35.03	89.02	9.3	1	0	0	0	0	2.719599363	0	0.827057232	0
1298	1	122.67	336.1	36.5	92.37	11.9	0	0	0	0	0	30.66549645	0	2.028149664	0
1299	1	59.7	250.68	23.82	72.14	11.2	1	0	0	0	0	97.63375666	0	10.26124365	1
1300	1	56.46	207.25	27.24	224.18	10.3	1	0	0	0	1	30.66549645	0	5.977230447	1
1300	2	92.49	389.24	23.76	114.36	9.6						40.77556618	0	3.460190425	0
1300	3	140.73	254.51	55.29	28.47	11.5	1	0	0	0	1	2.112573033	0	0.827057232	0
